# Supplementary material for: Improving the cyclability performance of lithium-ion batteries by introducing lithium difluorophosphate (LiPO2F2) additive
Source: Royal Society of Chemistry journal article supplement (doi:10.1039/c7ra03926c), 2017-01-01
Supplement: c7ra03926c1.pdf [file c7ra03926c1.pdf]

# Supporting Information

## Improving the cyclability performance of lithium-ion batteries by Introducing Lithium Difluorophosphate ( $\text{LiPO}_2\text{F}_2$ ) Additive

Guanghua Yang<sup>a,b†</sup>, Junli Shi<sup>a†</sup>, Cai Shen<sup>a</sup>, Shuwei Wang<sup>a,b</sup>, Lan Xia<sup>a</sup>, Huasheng Hu<sup>a</sup>, Hao Luo<sup>a</sup>, Yonggao Xia<sup>a\*</sup> and Zhaoping Liu<sup>a\*</sup>

<sup>a</sup>Ningbo Institute of Materials Technology & Engineering (NIMTE), Chinese Academy of Sciences, Ningbo, Zhejiang 315201, China.

<sup>b</sup>Department of Polymer Materials, Shanghai University, Shangda Street 99, Mailbox 152, Shanghai 200444, China.

†G. H. Yang and J. L. Shi contributed equally to this work.

\*Corresponding author: E-mail: xiayg@nimte.ac.cn (Yonggao Xia),

E-mail: liuzp@nimte.ac.cn (Zhaoping Liu).

1. The cyclic voltammogram of graphite/Li and LiCoO<sub>2</sub>/Li cells

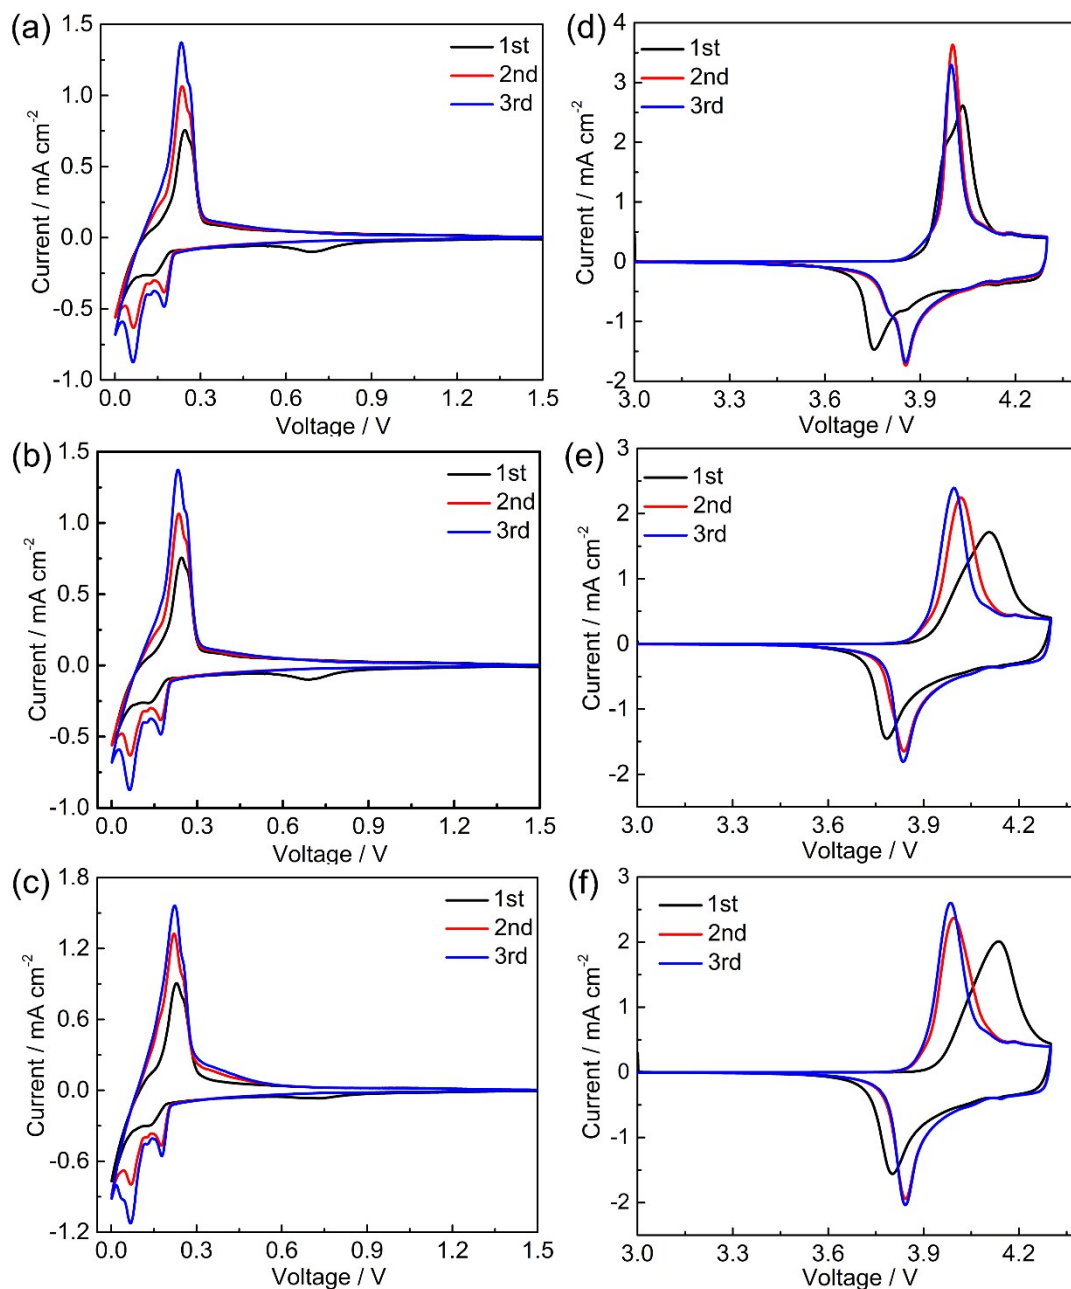

**Fig. S1.** Cyclic voltammogram of the graphite/Li cells with electrolytes A0 (a); A1 (b); A2 (c).

The scan rate is 0.1mV/ s<sup>-1</sup>. Cyclic voltammogram of the LiCoO<sub>2</sub>/Li cells with electrolytesA0 (d); A1 (e); A2 (f). The scan rate is 0.1 mV s<sup>-1</sup>.

## 2. Capacity retention of $\text{LiPO}_2\text{F}_2$ and other additives in different batteries

Table S1 capacity retention of  $\text{LiPO}_2\text{F}_2$  and other additives in different batteries

| electrolyte                                  | additive                         | capacity retention<br>(Li/graphite) | capacity retention<br>(Li/LiCoO <sub>2</sub> ) | capacity retention<br>(graphite/LiCoO <sub>2</sub> ) |
|----------------------------------------------|----------------------------------|-------------------------------------|------------------------------------------------|------------------------------------------------------|
|                                              |                                  | 50th                                | 100th                                          | 70th                                                 |
| 1M $\text{LiPF}_6$ /[EC+DMC(3/7)]            | 1.6wt% $\text{LiPO}_2\text{F}_2$ | 99.53%                              | 98.8%                                          | 98.5%                                                |
| 1 M $\text{LiClO}_4$ /PC                     | 3wt% VC                          | 96%                                 | -                                              | -                                                    |
|                                              | 3wt% FEC                         | 94.5%                               | -                                              | -                                                    |
|                                              | 3wt% ES                          | 0                                   | -                                              | -                                                    |
| 1 M $\text{LiPF}_6$ /<br>[EC+DMC+EMC(1/1/1)] | 3wt% TPSA                        | -                                   | 85%                                            | -                                                    |
| 1 M $\text{LiPF}_6$ /(EC+EMC)                | 0.5wt% LiBOB                     | -                                   | -                                              | 97.1%                                                |
|                                              | 2wt% LiBOB                       | -                                   | -                                              | 96.6%                                                |
|                                              | 1wt% LiBOB +<br>0.5wt% VEC       | -                                   | -                                              | 96.8%                                                |
|                                              | 1wt% LiBOB +<br>2wt% VC          | -                                   | -                                              | 97.74%                                               |
|                                              | 2wt% VC                          | -                                   | -                                              | 97.3%                                                |

### 3. The impedance spectroscopic analysis

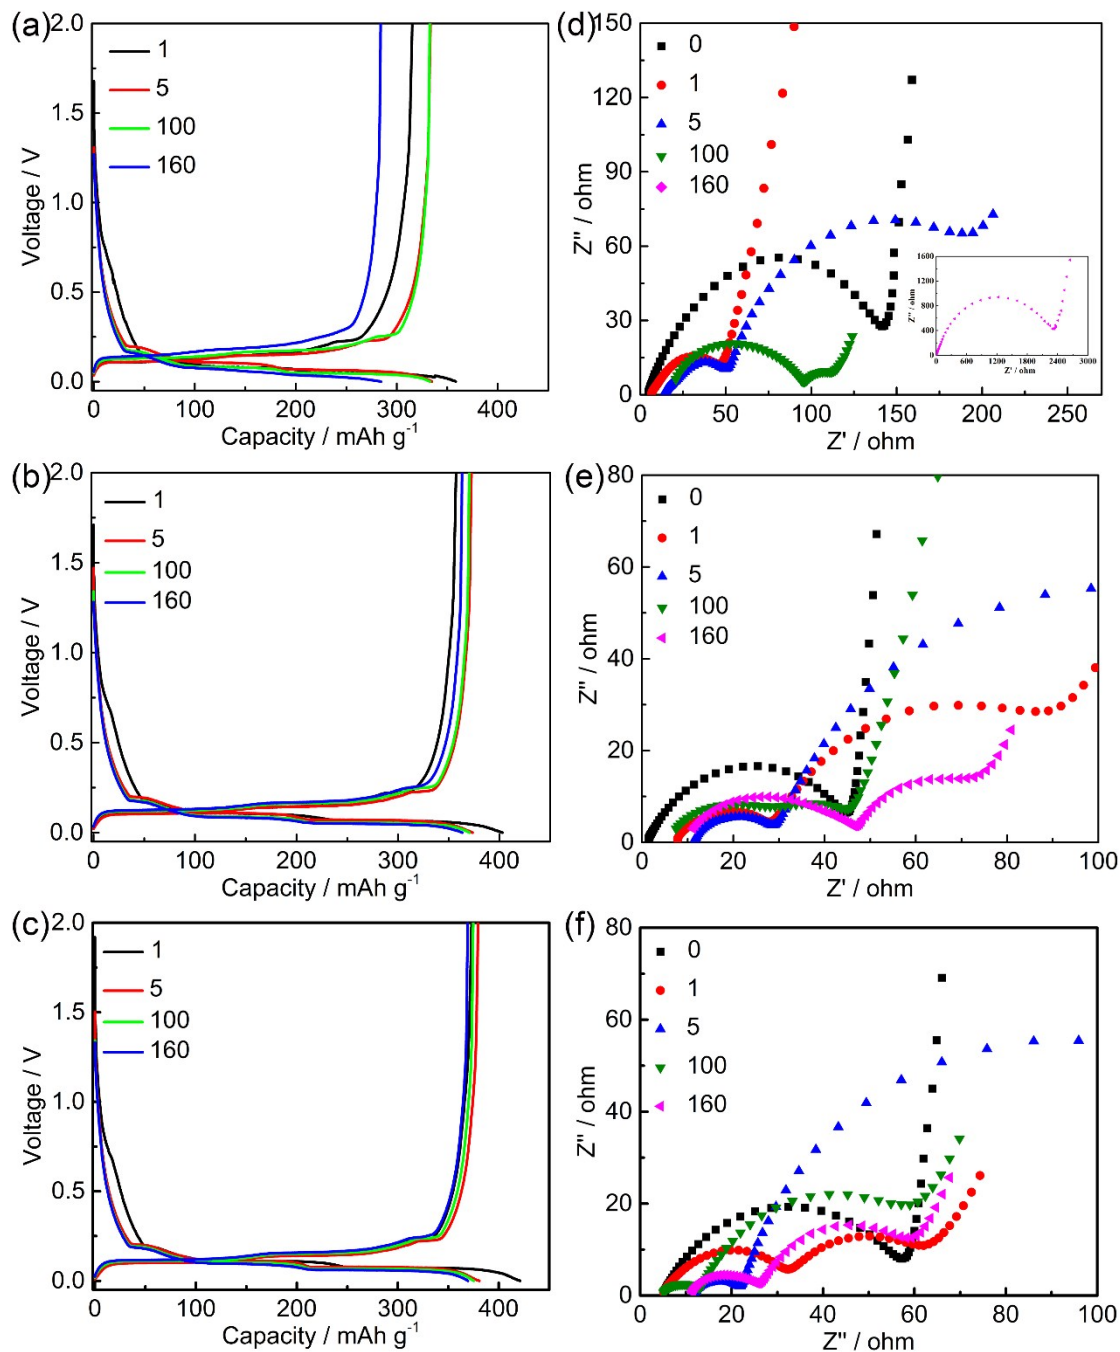

**Fig. S2.** Selected discharge-charge curves of graphite/Li cells with electrolytes A0 (a); A1 (b); A2 (c) at the cycles of 1st, 5th, 100th and 160th at 0.2 C in the potential range of 0-2V at 25 °C.

EIS spectra of the graphite/Li cells with electrolytes A0 (d); A1 (e); A2 (f) after storage for 24 h, 1st, 5th, 100th and 160th cycles at 0.2 C in the potential range of 0-2V at 25 °C.

We list  $R_{ct}$  values of graphite/Li and LiCoO<sub>2</sub>/Li half-cells in the table S2 and S3

**Table S2.**  $R_{ct}$  values of graphite/Li cells with A0, A1, and A2 after different cycles

| Cycle Number | $R_{ct}$ of A0            | $R_{ct}$ of A1            | $R_{ct}$ of A2            |
|--------------|---------------------------|---------------------------|---------------------------|
|              | ( $\Omega \text{ cm}^2$ ) | ( $\Omega \text{ cm}^2$ ) | ( $\Omega \text{ cm}^2$ ) |
| 0            | 11                        | 5                         | 6                         |
| 1            | 42                        | 19                        | 21                        |
| 5            | 27                        | 13                        | 11.9                      |
| 100          | 60                        | 15                        | 12.4                      |
| 160          | 1700                      | 17                        | 15.8                      |

**Table S3.**  $R_{ct}$  values of LiCoO<sub>2</sub>/Li cells with A0, A1, and A2 after different cycles

| Cycle Number | $R_{ct}$ of A0            | $R_{ct}$ of A1            | $R_{ct}$ of A2            |
|--------------|---------------------------|---------------------------|---------------------------|
|              | ( $\Omega \text{ cm}^2$ ) | ( $\Omega \text{ cm}^2$ ) | ( $\Omega \text{ cm}^2$ ) |
| 0            | 140                       | 47                        | 58                        |
| 1            | 80                        | 64                        | 50                        |
| 5            | 120                       | 70                        | 56                        |
| 100          | 150                       | 55                        | 50                        |
| 160          | 2200                      | 60                        | 48                        |

#### 4. The morphology and distribution of elements on the graphite electrode

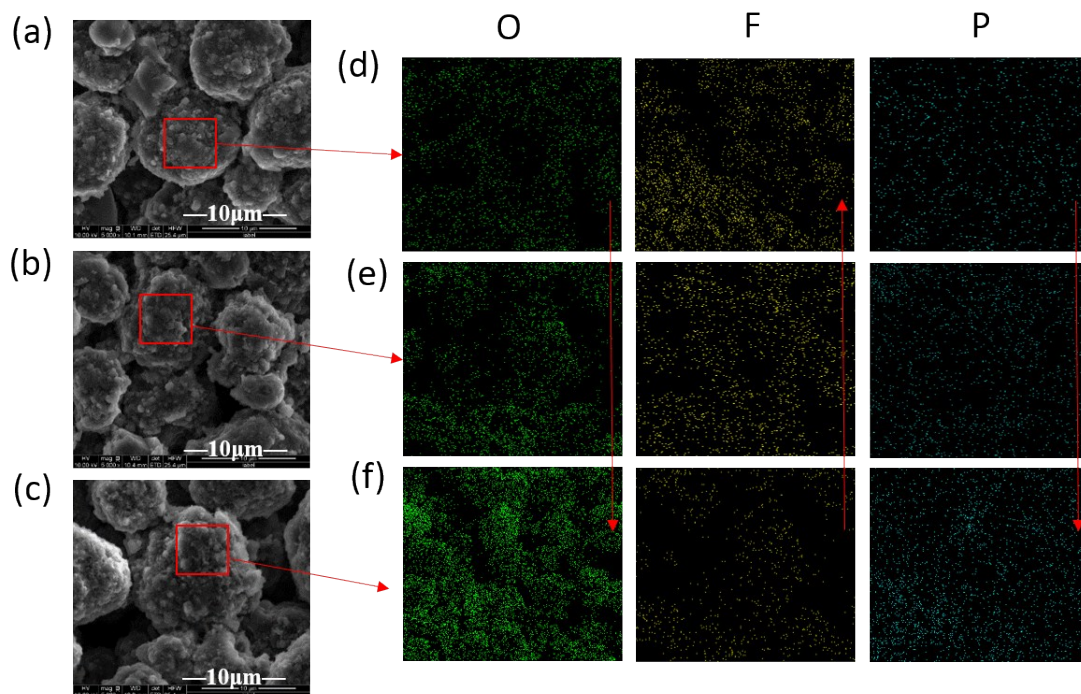

**Fig. S3.** The morphology and distribution of elements on graphite electrode surface by SEM and EDX after 160 cycles. The cell with electrolytes A0 (a); A1 (b); A2 (c). EDX mapping of the red region and the elements of the oxygen, fluorine, and phosphor. The cell with electrolytes A0 (d); A1 (e); A2 (f).

## 5. XPS spectra of the LiCoO<sub>2</sub> electrodes

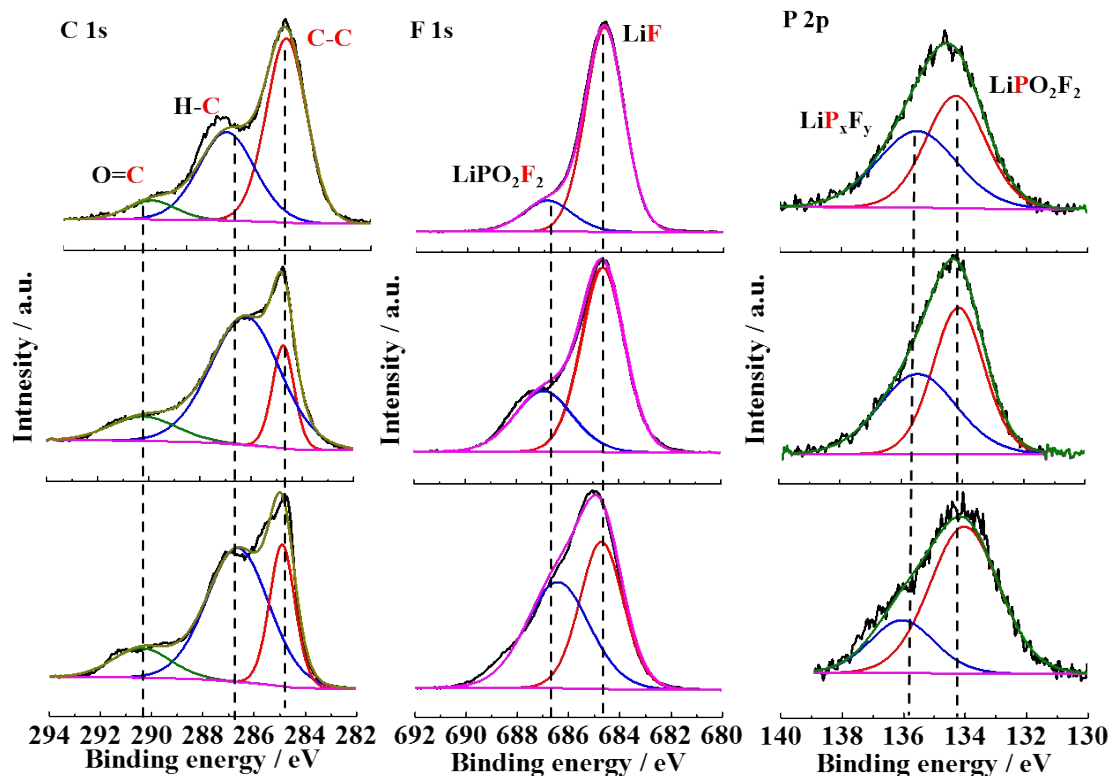

**Fig. S4.** C 1s, F 1s and P 2p XPS spectra of the LCoO<sub>2</sub> electrodes from the (top row) the cell with the electrolyte A0, the cell with the electrolyte A1, and the (bottom row) cell with the electrolyte A2 after 160 cycles at 25°C.

In the C 1s spectra, the peak located at 284.8 eV is assigned to C-C. The peak at 286.7 eV is attributed to C-O bond, and the peak at 289.9 eV is classified to OCO<sub>2</sub> group. These groups can be attributed to ROCO<sub>2</sub>Li, ROLi and Li<sub>2</sub>CO<sub>3</sub> species, which result from the decomposition of the electrolyte on the electrode surface.<sup>1</sup> In the F 1s spectra and P 2p spectra<sup>2</sup>. We get the same spectra with the results of the graphite surface.



1. M. Xu, L. Hao, Y. Liu, W. Li, L. Xing and B. Li, *J. Phys. Chem. C*, 2011, 115, 6085-6094.
2. M. Q. Xu, Y. L. Liu, B. Li, W. S. Li, X. P. Li and S. J. Hu, *Electrochem. Commun.*, 2012, 18, 123-126.
